# Supplementary material for: Enrichment of an intraspecific genetic map of upland cotton by developing markers using parental RAD sequencing
Source: PubMed Central journal article supplement (PMC4401325; doi:10.1093/dnares/dsu047), 2015-02-05
Supplement: supp_dsu047_dsu047supp_fig1.pdf [file supp_dsu047_dsu047supp_fig1.pdf]

LG1/Chr9or23

0.00 HAU-DJ-S165\*\*  
 6.75 HAU-DJ-S235  
 10.23 ACGGT-300  
 11.82 CGAGGT-420  
 13.38 ATGTTA-500  
 14.87 Gh539  
 16.01 CACGTC-800  
 17.49 HAU-DJ-S166  
 18.82 HAU-J6230  
 20.39 NAU3159\*  
 21.57 BNL3383  
 22.13 CGAGGT-200  
 24.61 CAACAA-1000  
 25.38 AGTGCA-800  
 27.07 ACCGAT-800  
 32.04 TCAGTC-300  
 32.90 HAU-D5528  
 34.98 HAU-DJ-S253  
 36.81 AGCGAT-750  
 39.24 TMB0670  
 45.68 AACGTC-400 AACGTC-700  
 50.70 HAU1792  
 52.55 MON\_CGR6576  
 52.96 HAU1918  
 61.90 MON\_CGR5110\*  
 68.15 NAU2658  
 70.86 MON\_CGR6252  
 73.60 HAU-DJ-I058\*\*  
 74.60 HAU-D526877  
 76.33 HAU-D5159\*\*  
 76.90 GRP1934  
 77.86 HAU-DJ-S254  
 78.42 NBRI\_HQ524340\*\*  
 79.40 NAU6984  
 80.04 AAGTAT-220\*\*  
 80.81 HAU2146\*  
 81.03 JESPR248\*\*  
 82.14 HAU-D5208\*  
 82.21 HAU3241\*\*  
 82.23 TMB0382\*  
 82.40 HAU-D5412\*  
 83.00 GATCAT-400  
 83.17 HAU-D5323  
 83.28 MON\_CGR5218a\*  
 83.83 DPL0012  
 83.88 NAU6764  
 85.42 HAU2553  
 85.58 MON\_SHIN-0154  
 86.15 HAU-DJ-S265  
 87.20 MON\_CGR5494\*  
 88.12 HAU3576a\*  
 88.82 MON\_DC40085  
 89.42 TMB1758  
 90.69 Gh551\*  
 93.27 AACGTC-850\*\*  
 94.57 GTCGCC-300\*\*  
 98.52 MON\_DPL0044  
 103.60 HAU0270  
 106.19 MGHE56  
 106.91 MUCS133  
 110.90 CAGCGC-300  
 114.17 CAGAAA-400  
 121.62 DPL0218  
 123.90 JESPR114  
 126.87 HAU-J6181  
 129.82 AACGTC-200  
 140.30 NAU864  
 153.12 HAU0190  
 154.65 HAU4027  
 167.04 HAU1661\*\*  
 170.69 DPL0395\*\*  
 180.26 HAU3414\*\*  
 193.30 MON\_CGR6806\*\*

LG2/Chr19

0.00 Gh381\*\*  
 20.50 Gh109\*  
 24.85 NAU3217  
 29.55 NAU2126  
 30.57 NAU5330  
 32.68 NAU3497  
 34.75 HAU4819  
 38.86 TMB0176  
 44.45 MON\_DPL0064  
 50.47 BNL3875  
 54.64 MON\_CGR5539  
 55.69 DPL0071  
 65.59 NAU911  
 68.02 MON\_DPL0001  
 78.38 MON\_DC30008  
 84.65 HAU4781\*\*  
 94.99 NAU2274  
 101.89 BNL2786  
 102.28 NAU3096  
 109.41 HAU-D5211  
 114.40 HAU-DJ-S406  
 121.61 BNL4069  
 125.05 Gh447  
 125.89 GTACAT-170  
 127.46 CTCGTC-850  
 136.95 TGATTA-450  
 141.19 NAU3110  
 166.19 GAAATA-1030  
 169.31 NAU4907  
 178.50 MON\_CGR5022

LG3/Chr1or15

0.00 TMB0375  
 16.15 CTACCC-250  
 18.45 NBRI\_HQ527566\*  
 19.83 CACTCT-750  
 21.76 MON\_CGR5875  
 22.09 MUSB1267  
 23.23 NAU2165  
 24.96 DPL0300  
 25.99 NBRI\_HQ527317  
 28.16 HAU2102b  
 28.41 HAU-D5388  
 28.63 NAU4044  
 29.16 MON\_DPL0437  
 29.39 BNL2599  
 30.17 NAU3083  
 31.65 HAU2102a  
 32.48 ACCAGC-300  
 32.91 CIR307  
 33.09 ACCCTG-600  
 33.46 MON\_COT059  
 33.82 CIR234  
 34.46 BNL2920  
 35.10 HAU-DJ-S003  
 36.66 HAU-J6039  
 37.51 ACCAAC-350  
 38.42 BNL3345  
 40.04 HAU-DJ-I089  
 41.61 HAU-DJ-S035  
 43.84 BNL2827  
 45.48 MON\_CGR6529  
 50.23 HAU3923  
 50.96 NBRI\_HQ526730  
 53.64 NAU1001  
 54.48 BNL830  
 57.99 HAU-J6126  
 58.83 NAU5107  
 58.83 MON\_DPL0052  
 65.72 NAU1001  
 66.44 TMB0409  
 68.03 HAU-DJ-I038a\*  
 74.29 MON\_CGR5826  
 76.38 MON\_CGR5853\*  
 77.96 MON\_DPL0419\*\*  
 79.85 S282-800  
 80.56 NAU4891  
 81.36 ATTACA-1250  
 82.24 GAAACA-1060\*  
 82.78 ACAACA-1250\*  
 83.25 GACACA-350  
 83.92 ACTACA-1250\*\*  
 84.80 HAU-D5005  
 85.76 HAU4220  
 85.92 ACCAGT-900\*  
 86.70 TMB0791  
 87.62 CTCGTA-800  
 92.70 Gh216  
 94.72 HAU-DJ-S233  
 94.89 BNL2921  
 97.44 MON\_DPL0407\*  
 99.99 TTGTA-900\*  
 101.01 AAAGATG-800  
 102.48 HAU-D5039  
 102.74 NAU2741  
 103.85 HAU-DJ-I038b\*\*  
 104.53 HAU2139  
 106.55 HAU-DJ-I027  
 107.32 NAU5163  
 109.98 MON\_CGR6129  
 110.74 MON\_CGR5056  
 113.40 HAU-DJ-S081  
 114.67 CCATTC-1400  
 117.00 DPL0752  
 119.77 MON\_DPL0090  
 122.68 NAU3346  
 129.41 HAU1721  
 135.57 MON\_CGR5282  
 140.41 TCAAGT-200  
 159.12 HAU4552

LG4/Chr20

0.00 HAU-DJ-I4959  
 8.25 TTGCTA-1300  
 17.05 HAU3611  
 24.93 CIR043  
 35.33 TMB0889  
 36.88 GTGTTG-800  
 39.31 BNL3948  
 41.21 HAU-DJ-S174  
 41.99 TTCAGC-800  
 42.61 HAU-D5428  
 43.59 HAU-DJ-I071  
 46.23 TACGCC-600  
 46.61 BNL946  
 47.67 DPL0135  
 48.65 TMB1939  
 50.21 HAU-DJ-S077  
 54.08 BNL3071  
 54.95 GACTTG-250  
 55.70 HAU0230  
 56.98 NAU3665  
 58.30 NAU2869  
 60.52 HAU-DJ-I086  
 62.52 HAU-J6117  
 73.30 TGATTT-520  
 74.98 DPL0442  
 77.27 TMB0644  
 79.50 TATAGC-760  
 81.69 HAU-DJ-I102  
 83.66 NAU2991  
 84.78 Gr-Gh012  
 86.78 MON\_CGR6154  
 93.40 DPL0028  
 95.30 JESPR190  
 96.32 MON\_COT119  
 107.67 HAU1224  
 131.51 MON\_CGR6110

LG5/Chr7

0.00 S277b  
 4.75 MON\_CER0028  
 7.11 TMB1838\*\*  
 11.97 HAU4589  
 15.75 MON\_CGR5851a  
 16.51 GACGGG-180\*\*  
 19.57 NAU3639\*\*  
 22.52 TTGCA-300\*\*  
 31.52 MON\_CGR6528\*\*  
 33.97 DPL0448\*\*  
 34.60 HAU-DJ-S004\*\*  
 38.23 HAU-DJ-S078\*\*  
 45.22 GTTGTG-780\*\*  
 46.20 TCCTGG-900  
 48.47 ACCGAC-400\*\*  
 50.56 TCATGG-280  
 51.78 MGHE575\*\*  
 56.87 ACATGC-1100  
 60.95 NAU1190a\*\*  
 68.11 HAU-D5478\*\*  
 70.63 HAU-J5712\*\*  
 82.12 NBRI\_HQ527867  
 83.74 MON\_CGR5372  
 84.01 NAU1190a\*\*  
 85.43 HAU2138\*\*  
 85.66 MON\_CGR6586  
 100.95 MON\_CGR5001  
 105.52 HAU3319  
 106.55 MGHE558  
 107.44 MON\_SHIN-0376  
 112.96 HAU4228  
 121.54 CAATGT-850  
 128.95 HAU-DJ-S281

LG6/Chr25

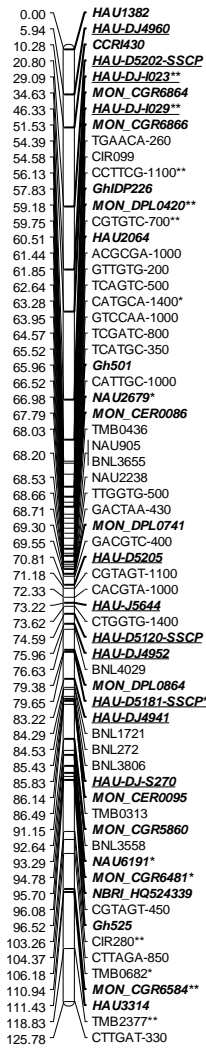

LG7/Chr26

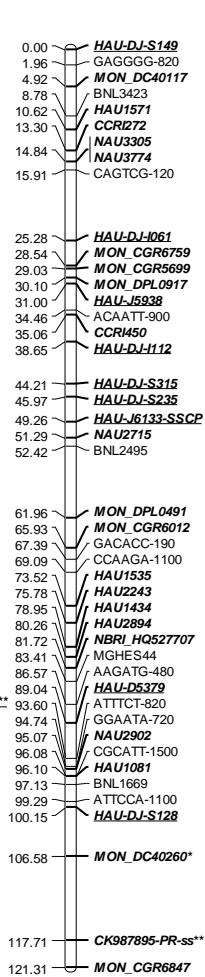

LG8/Chr21

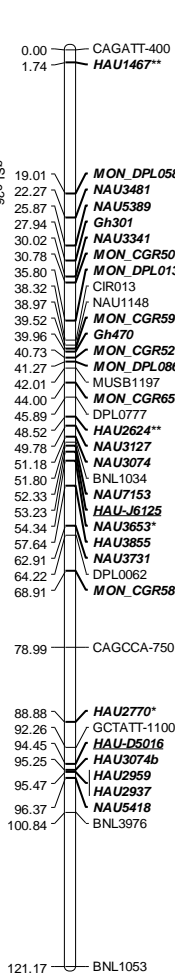

LG9/Chr7or16

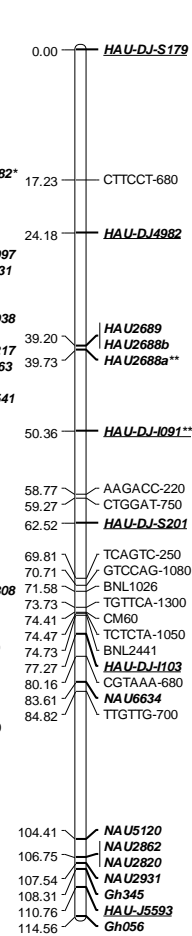

LG10/Chr21

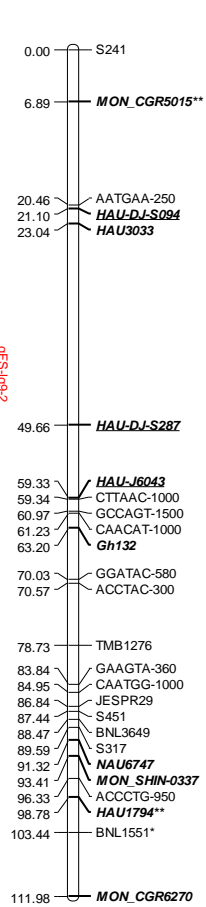

qF1-c21

LG11/Chr11

LG12/Chr9

LG13/Chr12

LG14/Chr4

LG15/Chr7

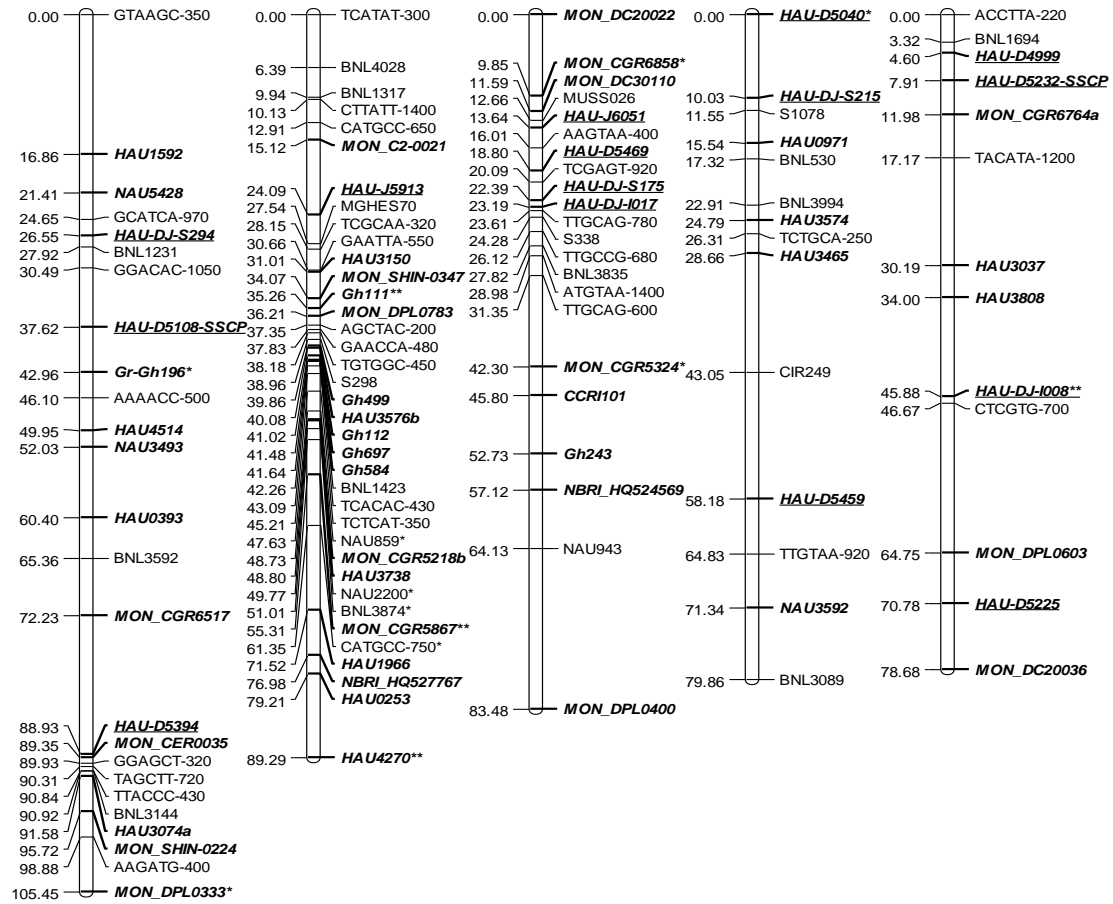

LG16/Chr22

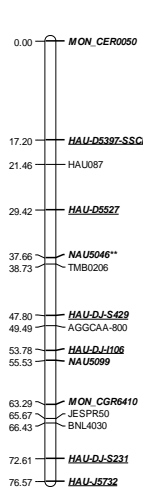

LG17/Chr8

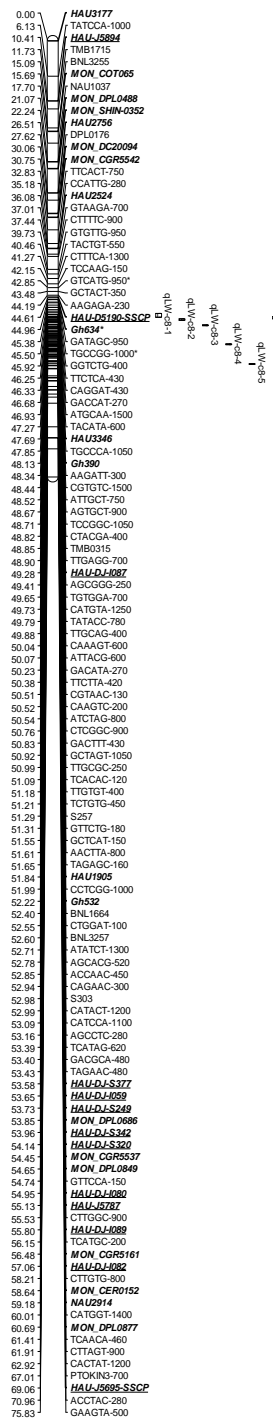

LG18/Chr14

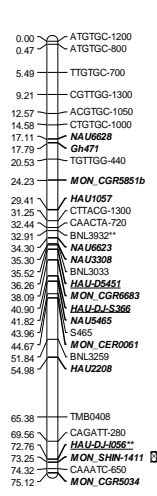

LG19/Chr13

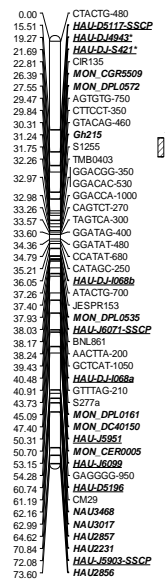

LG20/Chr5

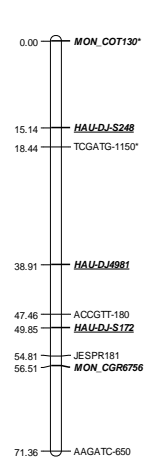

LG21/Chr6

LG22/Chr5

LG23/Chr10

LG24/Chr17

LG25/Chr10

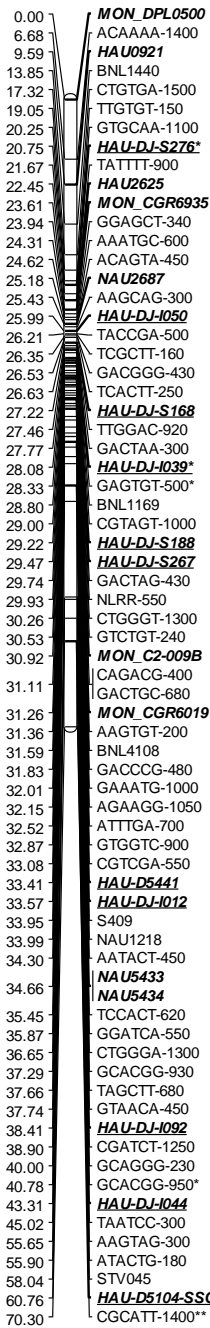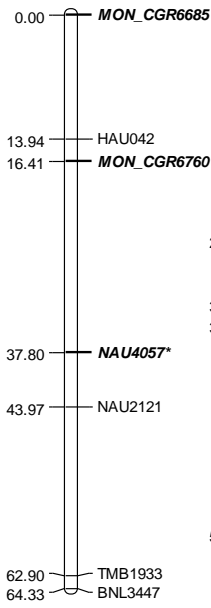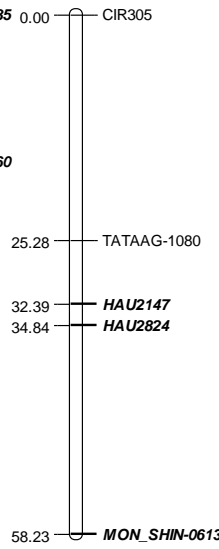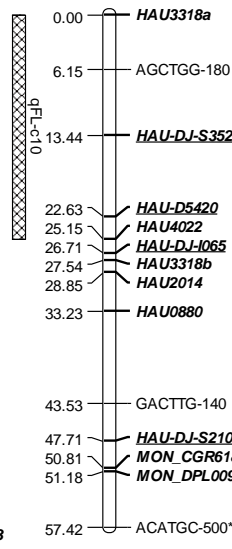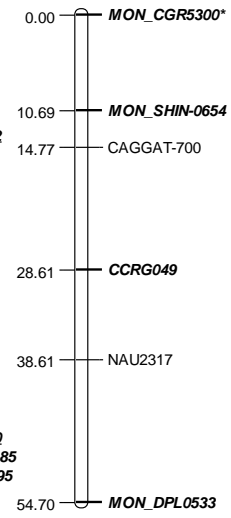

**LG26/Chr5**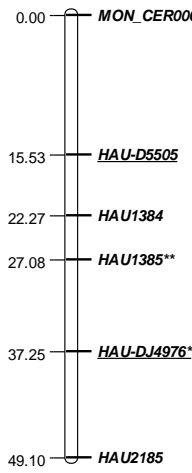**LG27/Chr21**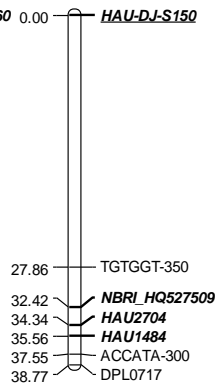**LG28/Chr24**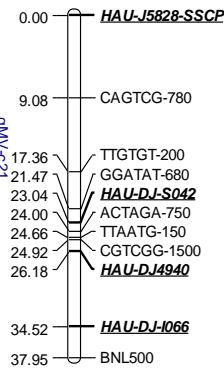**LG29/Chr18**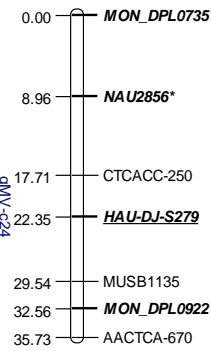**LG30/Chr10**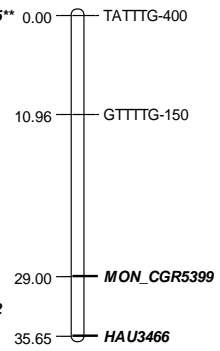**LG31**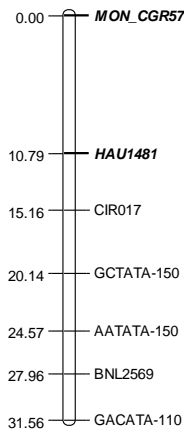**LG32/Chr14**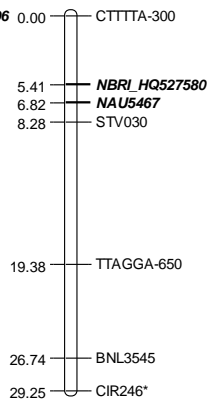**LG33/Chr15**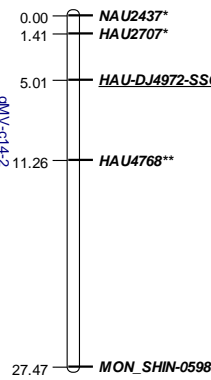**LG34/Chr25**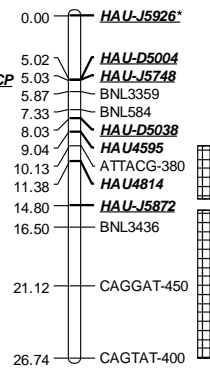**LG35/Chr24**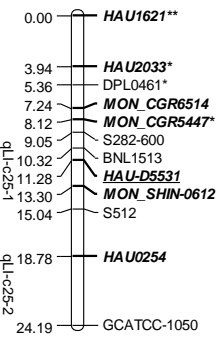**LG36**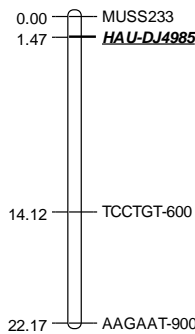**LG37/Chr13**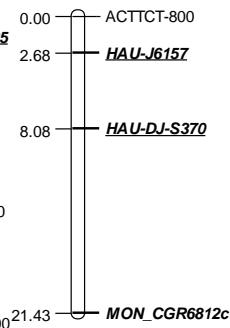**LG38/Chr12**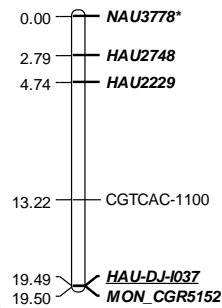**LG39/Chr2**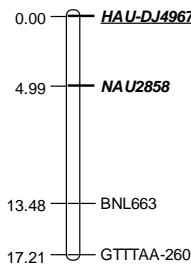**LG40/Chr13**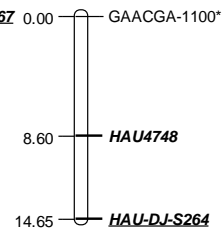

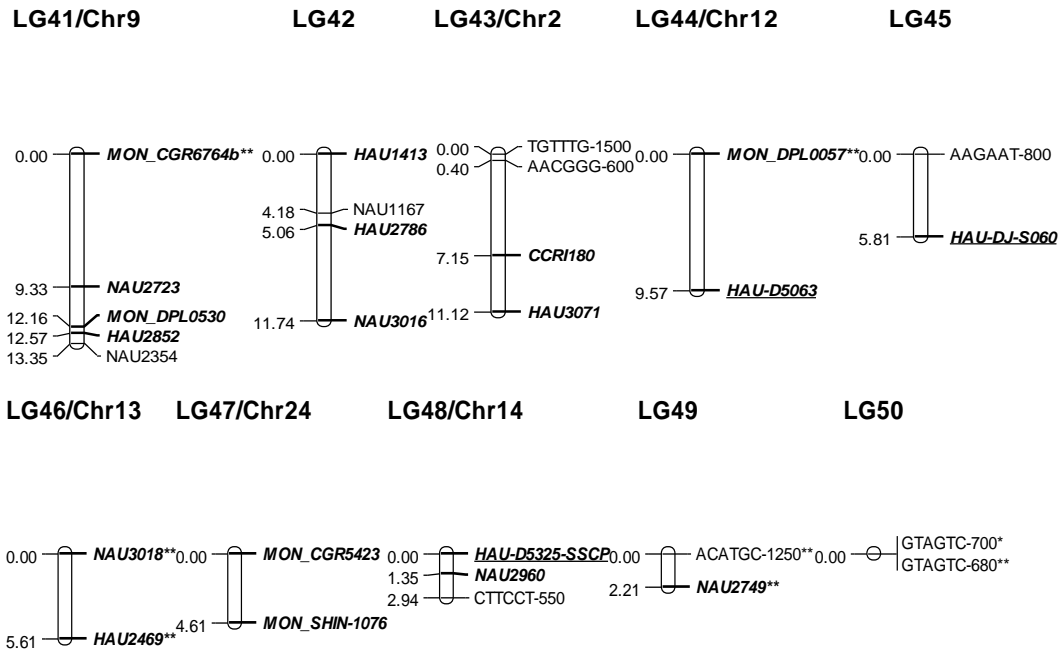

Figure S1. A genetic map of the cotton genome developed in 137 plants of the F<sub>2</sub> population derived from *G. hirsutum* accession DH962 and *G. hirsutum* cultivar Jimian5. A total of 1013 loci were mapped on 50 linkage groups. The locations of 21 QTLs for yield components, 12 QTLs for fiber quality are shown. Markers showing segregation distortion are indicated by asterisks (\*P < 0.05; \*\* P < 0.01). The marker development from RAD-seq are underlined, italic, and in bold, other new added markers are italic, in bold.
