# Supplementary material for: Enrichment of an intraspecific genetic map of upland cotton by developing markers using parental RAD sequencing
Source: PubMed Central journal article supplement (PMC4401325; doi:10.1093/dnares/dsu047), 2015-02-05
Supplement: supp_dsu047_dsu047supp_table5.pdf [file supp_dsu047_dsu047supp_table5.pdf]

QTLs detected for yield components and fiber quality in F<sub>2</sub> population of upland cotton. The new

QTLs were in bold

| Traits | QTL       | Location | Marker interval           | Nearest marker | Position | LOD  | R <sup>2</sup> | A     | D     | Mode      |
|--------|-----------|----------|---------------------------|----------------|----------|------|----------------|-------|-------|-----------|
| BN     | qBN-c20-1 | Chr20    | HAU-J6117-HAU-DJ-I102     | <b>DHL0442</b> | 74.31    | 5.17 | 14.55%         | -1.57 | 0.08  | A         |
|        | qBN-c20-2 | Chr20    | MON_COT119-MON_CGR6110    | HAU1224        | 107.68   | 5.64 | 14.88%         | 1.92  | -0.64 | <b>FD</b> |
| SCW    | qSCW-c7-1 | Chr7     | HAU1693-HAU-D5478         | ACATGC-1100    | 56.79    | 4.49 | 11.61%         | -0.09 | 0.22  | OD        |
|        | qSCW-c7-2 | Chr7     | HAU-D5478-HAU-J5712       | HAU-D5478      | 61.96    | 4.95 | 12.27%         | 0.06  | 0.42  | OD        |
| LW     | qLW-c20   | Chr20    | GTGTTG-800-HAU-DJ-S174    | BNL3948        | 38.89    | 4.67 | 11.50%         | 0.09  | -0.01 | A         |
|        | qLW-c8-1  | Chr8     | TACATA-600-Gh390          | HAU3346        | 47.7     | 4.78 | 11.04%         | -0.06 | 0.02  | PD        |
|        | qLW-c8-2  | Chr8     | Gh390-AGTGCT-900          | CGTGTC-1500    | 48.45    | 4.59 | 10.62%         | -0.07 | 0.03  | <b>FD</b> |
|        | qLW-c8-3  | Chr8     | HAU-DJ-I087-TGTGGA-700    | AGCGGG-250     | 49.42    | 4.44 | 10.41%         | -0.06 | 0.02  | <b>FD</b> |
|        | qLW-c8-4  | Chr8     | BNL3257-AGCACG-520        | ATATCT-1300    | 52.72    | 4.39 | 10.31%         | -0.06 | 0.03  | <b>FD</b> |
|        | qLW-c8-5  | Chr8     | TCATGC-200-MON_CGR5161    | TCATGC-200     | 56.16    | 4.22 | 9.80%          | -0.06 | 0.03  | <b>FD</b> |
| SI     | qSI-c7    | Chr7     | HAU1693-HAU-D5478         | ACATGC-1100    | 56.88    | 4.50 | 12.15%         | -0.29 | 0.45  | OD        |
|        | qSI-c26   | Chr26    | NAU3305-HAU-DJ-I061       | CAGTCG-120     | 17.92    | 4.26 | 13.19%         | 0.37  | -0.44 | OD        |
|        | qSI-c8-1  | Chr8     | TGCCCA-1050-AAGATT-300    | Gh390          | 48.14    | 5.01 | 14.09%         | -0.31 | -0.06 | <b>FD</b> |
|        | qSI-c8-2  | Chr8     | TAGAGC-160-CTGGAT-100     | CCTCGG-1000    | 52       | 4.96 | 13.91%         | -0.36 | 0.00  | A         |
|        | qSI-c8-3  | Chr8     | AGCACG-520-TAGAAC-480     | CATCCA-1100    | 53       | 4.28 | 12.26%         | -0.31 | -0.03 | A         |
| LP     | qLP-c20   | Chr20    | TATAGC-760-DHL0026        | Gr-Gh012       | 83.67    | 5.77 | 13.43%         | 0.92  | -0.65 | <b>FD</b> |
|        | qLP-c13   | Chr13    | HAU-D5117-SSCPHAU-DJ-S421 | HAU-DJ4943     | 19.28    | 4.53 | 10.70%         | -0.66 | -0.35 | <b>FD</b> |
| LI     | qLI-Ig1   | LG1      | TMB0670-HAU1792           | AACGTC-400     | 45.69    | 4.49 | 10.16%         | 0.19  | -0.10 | <b>FD</b> |
|        | qLI-c20   | Chr20    | CIR043-HAU-DJ-S077        | BNL3948        | 38.89    | 7.83 | 16.62%         | 0.24  | -0.07 | PD        |
|        | qLI-c25-1 | Chr25    | HAU4595-HAU-J5872         | HAU4814        | 11.39    | 6.14 | 12.41%         | -0.23 | 0.03  | <b>FD</b> |
| FL     | qLI-c25-2 | Chr25    | HAU-J5872-CAGTAT-400      | CAGGAT-450     | 21.13    | 6.91 | 14.35%         | -0.25 | 0.11  | <b>FD</b> |
|        | qFL-c21   | Chr21    | TMB1276-CAATGG-1000       | GAAGTA-360     | 83.74    | 4.11 | 7.59%          | 0.06  | 0.46  | OD        |
|        | qFL-c14   | Chr14    | CAGATT-280-MON_SHIN-1411  | HAU-DJ-I056    | 72.77    | 6.32 | 13.38%         | 0.62  | -0.45 | <b>FD</b> |
|        | qFL-c10   | Chr10    | CIR305-TATAAG-1080        | CIR305         | 6.01     | 9.57 | 37.09%         | 1.16  | 1.15  | D         |
| FS     | qFS-Ig9-1 | LG9      | HAU-DJ4982-HAU2688a       | HAU2689        | 38.19    | 4.13 | 18.88%         | 0.51  | 1.06  | OD        |
|        | qFS-Ig9-2 | LG9      | HAU2688a-HAU-DJ-I091      | HAU2688a       | 41.74    | 4.74 | 23.23%         | 0.57  | 1.76  | OD        |
| FE     | qFE-c22-1 | Chr22    | HAU-D5397-SSCPHAU087      | HAU-D5397-SSCP | 17.21    | 4.05 | 10.08%         | -0.14 | 0.02  | A         |
|        | qFE-c22-2 | Chr22    | HAU087-NAU5046            | HAU-D5527      | 32.43    | 4.63 | 13.92%         | -0.11 | -0.13 | D         |
| MV     | qMV-c22   | Chr22    | HAU-D5527-TMB0206         | NAU5046        | 37.67    | 5.38 | 12.24%         | 0.06  | 0.18  | OD        |
|        | qMV-c21   | Chr21    | HAU-DJ-S150-TGTGGT-350    | TGTGGT-350     | 15.01    | 4.31 | 18.92%         | 0.01  | 0.23  | OD        |
|        | qMV-c24   | Chr24    | TTGTGT-200-HAU-DJ-S042    | GGATAT-680     | 21.48    | 4.24 | 10.23%         | -0.13 | -0.04 | PD        |
|        | qMV-c14-1 | Chr14    | NBRI_HQ527580-NAU5467     | NAU5467        | 6.42     | 4.04 | 8.72%          | 0.00  | -0.15 | OD        |
|        | qMV-c14-2 | Chr14    | NAU5467-TTAGGA-650        | STV030         | 7.83     | 4.12 | 8.85%          | -0.01 | -0.15 | OD        |
